# Supplementary material for: SARS-CoV-2 enzyme-linked immunosorbent assays as proxies for plaque reduction neutralisation tests
Source: Springer Nature journal article supplement (doi:10.1038/s41598-022-07263-8), 2022-03-01

**SARS-CoV-2 enzyme-linked immunosorbent assays as proxies for  
plaque reduction neutralisation tests**

**Supplementary Data 3  
Western blot images**

**Supplementary Data 3 – Western blot images**

S1 = spike subunit 1, S2 = spike subunit 2, N = nucleocapsid

Sample 11

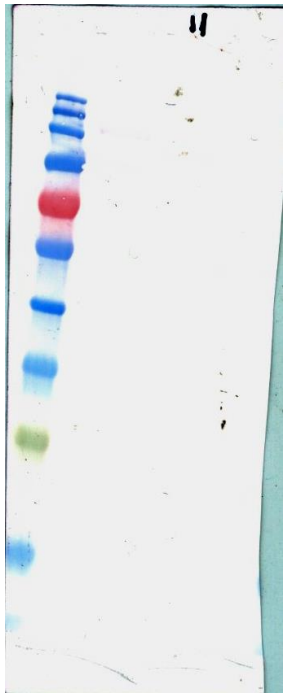

S1 S2 N

Sample 63

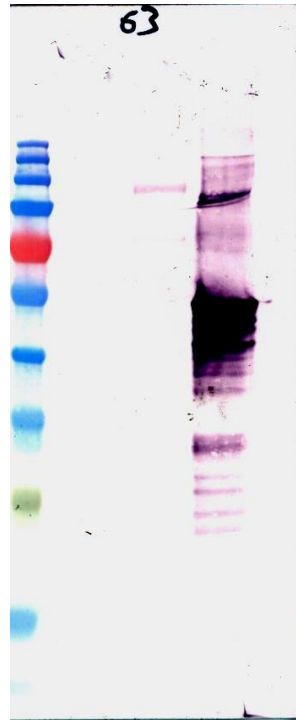

S1 S2 N

Sample 241

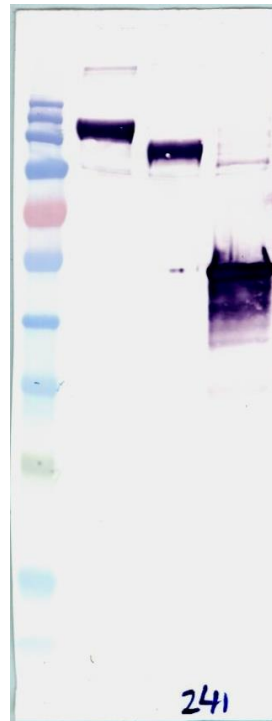

S1 S2 N

Sample 275

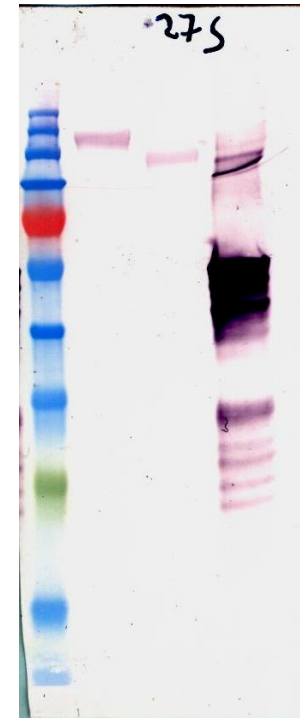

S1 S2 N

Sample 297

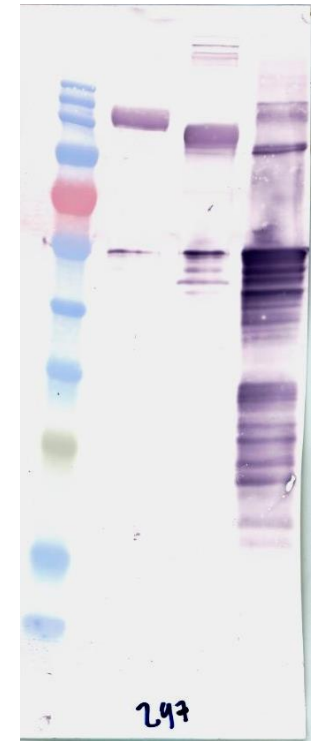

S1 S2 N

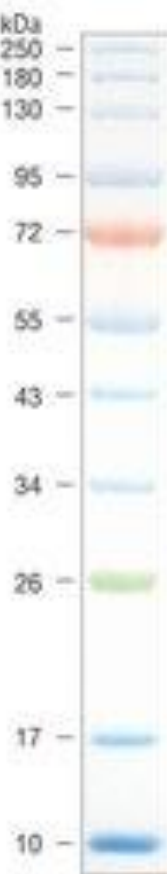

**Supplementary Data 3 – Western blot images**

S1 = spike subunit 1, S2 = spike subunit 2, N = nucleocapsid

Sample 303

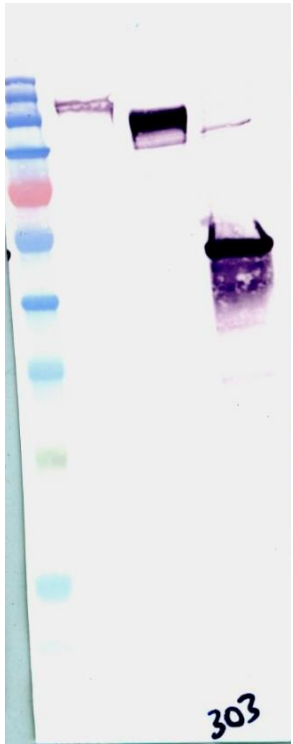

S1 S2 N

Sample 314

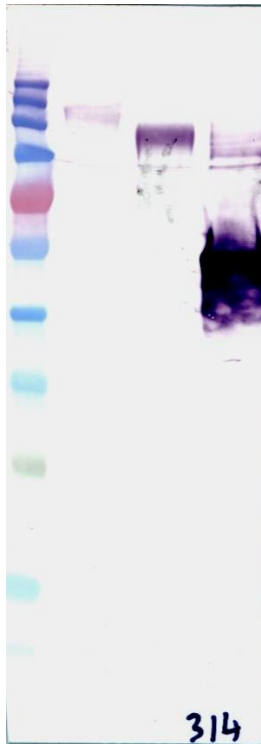

S1 S2 N

Sample 351

Insufficient  
sample  
volume for  
assay

Sample 355

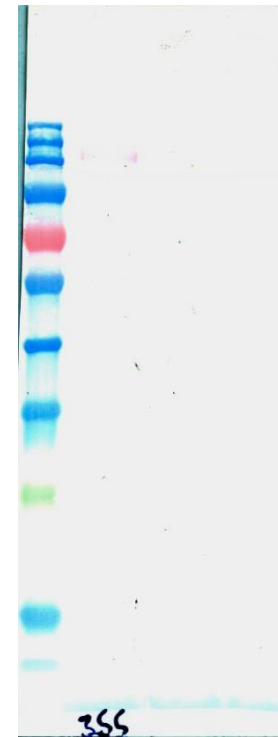

S1 S2 N

Sample 383

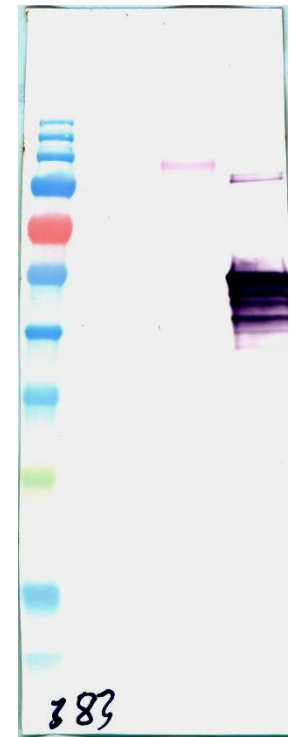

S1 S2 N



**Supplementary Data 3 – Western blot images**

S1 = spike subunit 1, S2 = spike subunit 2, N = nucleocapsid

Sample 415

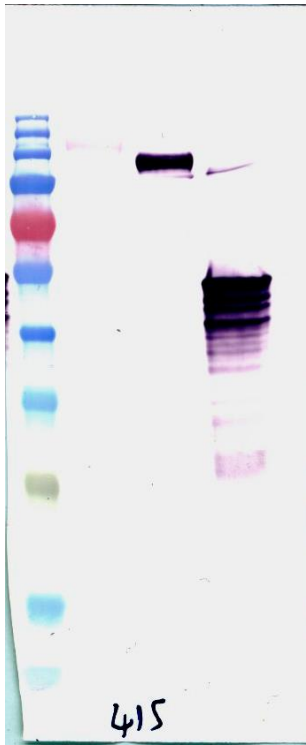

S1 S2 N

Sample 453

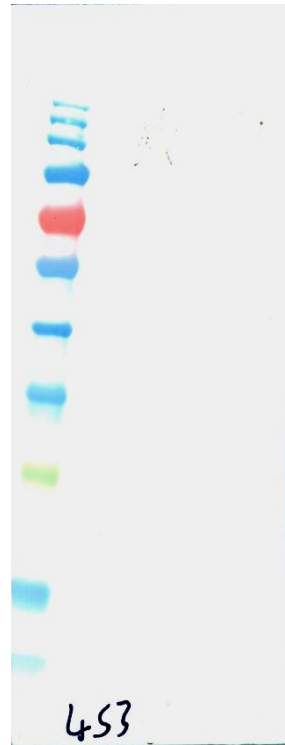

S1 S2 N

Sample 474

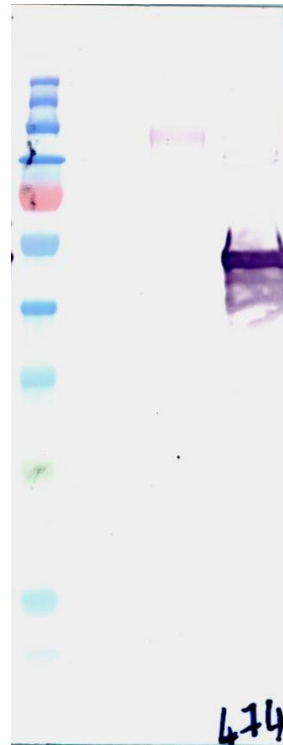

S1 S2 N

Sample 491

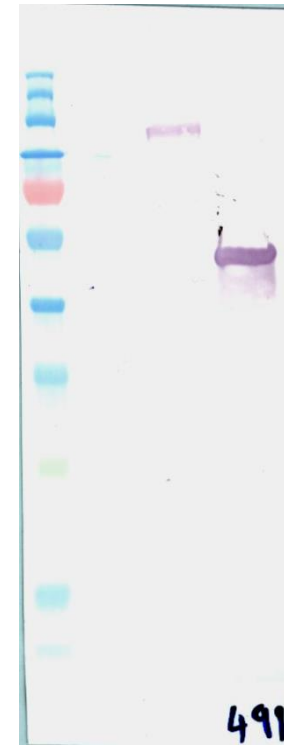

S1 S2 N

Sample 493

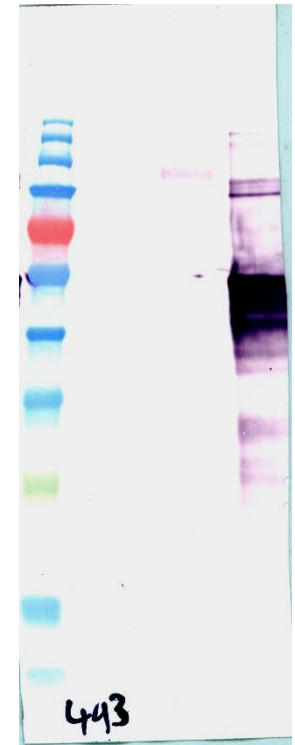

S1 S2 N

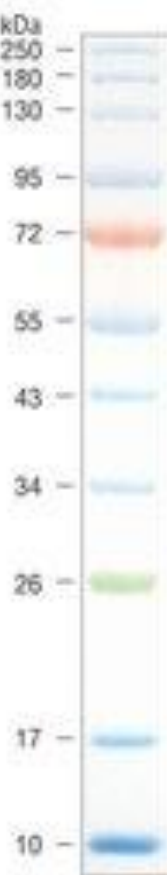

**Supplementary Data 3 – Western blot images**

S1 = spike subunit 1, S2 = spike subunit 2, N = nucleocapsid

Sample 497

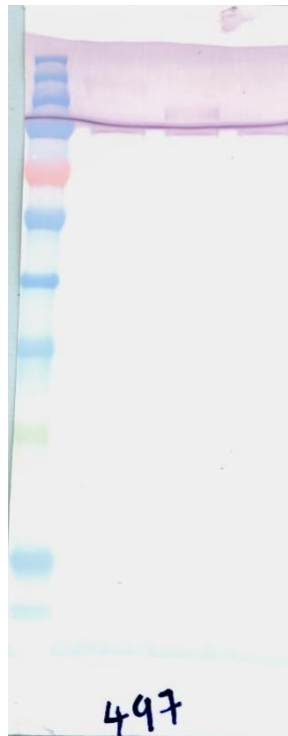

S1 S2 N

Sample 515

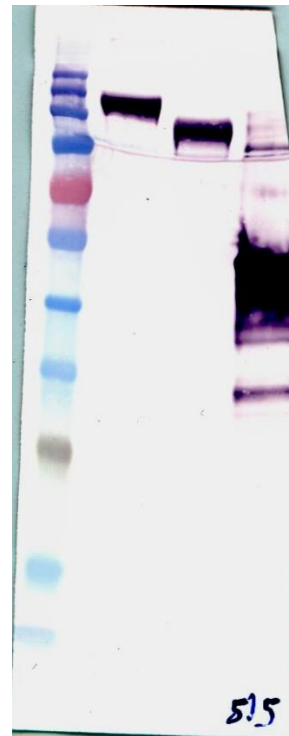

S1 S2 N

Sample 545

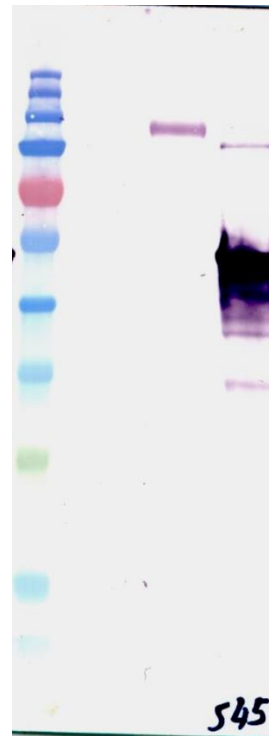

S1 S2 N

Sample 551

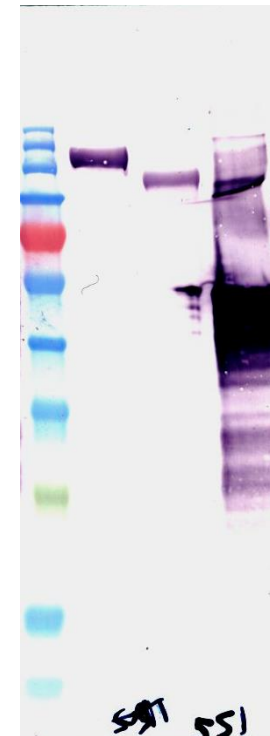

S1 S2 N

Sample 566

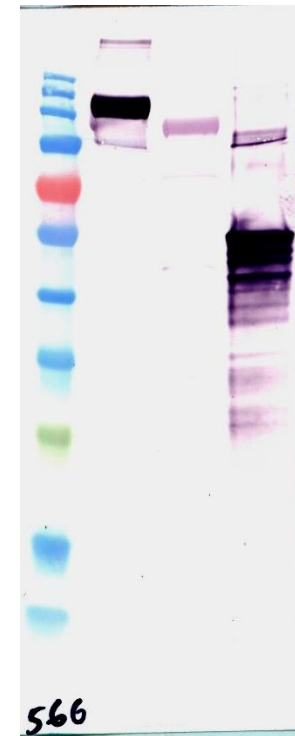

S1 S2 N



**Supplementary Data 3 – Western blot images**

S1 = spike subunit 1, S2 = spike subunit 2, N = nucleocapsid

Sample 605

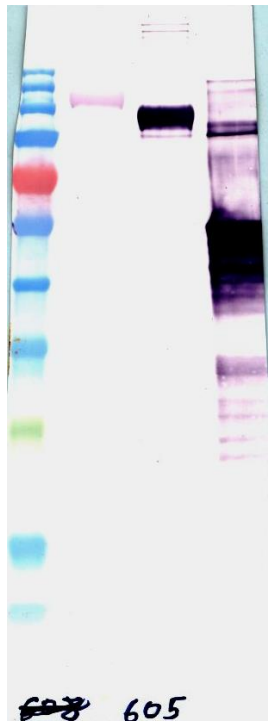

S1 S2 N

Sample 661

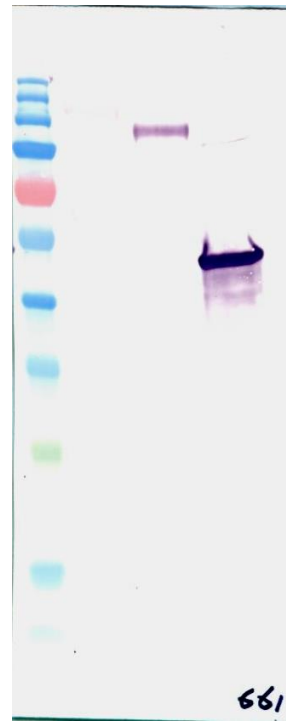

S1 S2 N

Sample 724

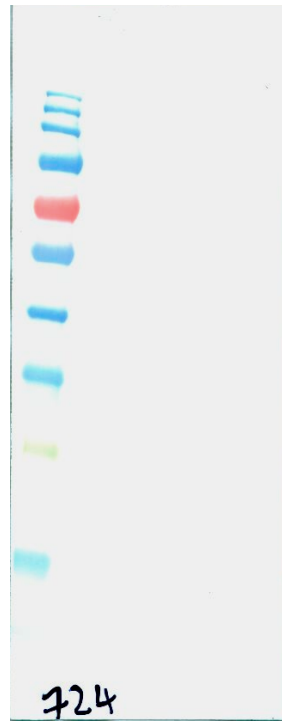

S1 S2 N

Sample 729

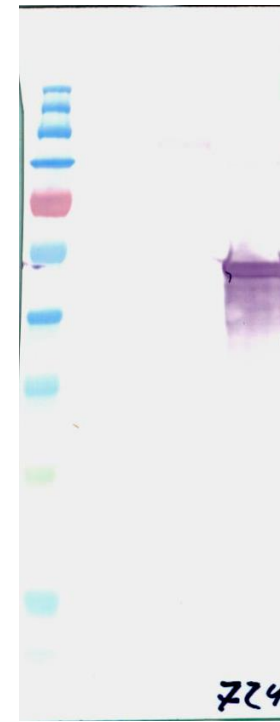

S1 S2 N

Sample 730

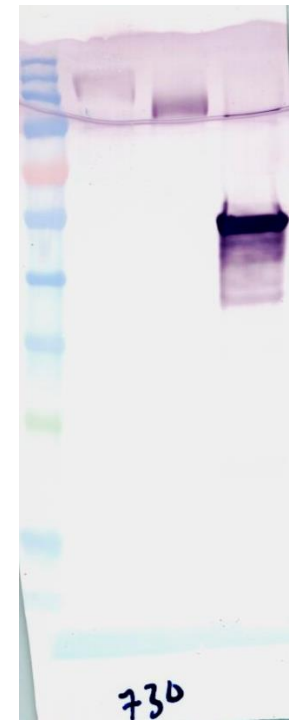

S1 S2 N



**Supplementary Data 3 – Western blot images**

S1 = spike subunit 1, S2 = spike subunit 2, N = nucleocapsid

Sample 742

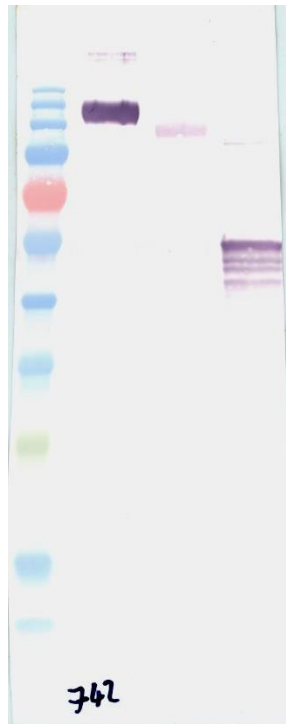

S1 S2 N

Sample 746

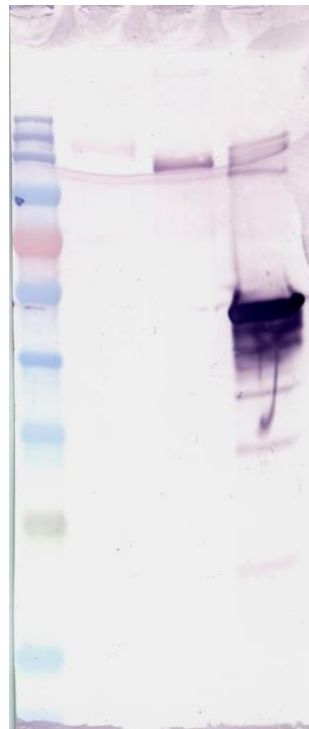

S1 S2 N

Sample 751

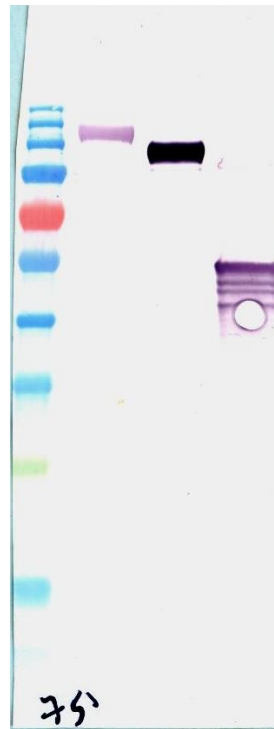

S1 S2 N

Sample 764

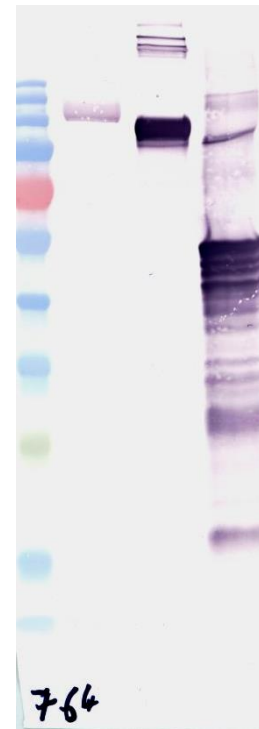

S1 S2 N

Sample 767

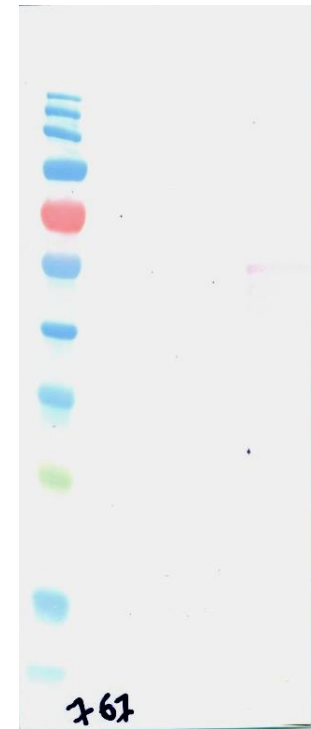

S1 S2 N

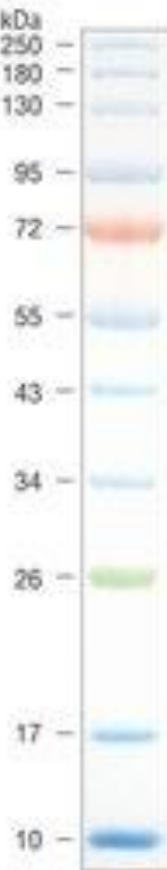

**Supplementary Data 3 – Western blot images**

S1 = spike subunit 1, S2 = spike subunit 2, N = nucleocapsid

Sample 789

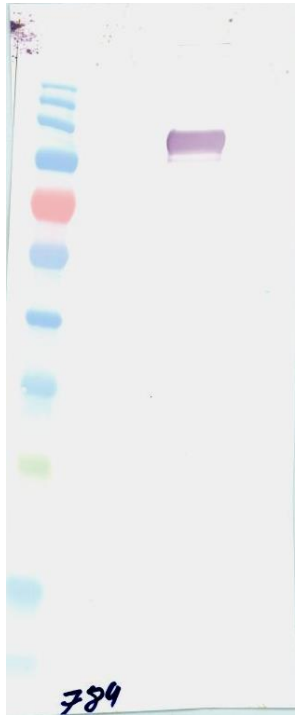

S1 S2 N

Sample 794

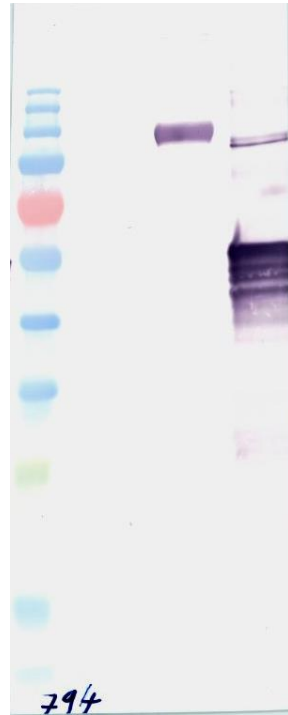

S1 S2 N

Sample 795

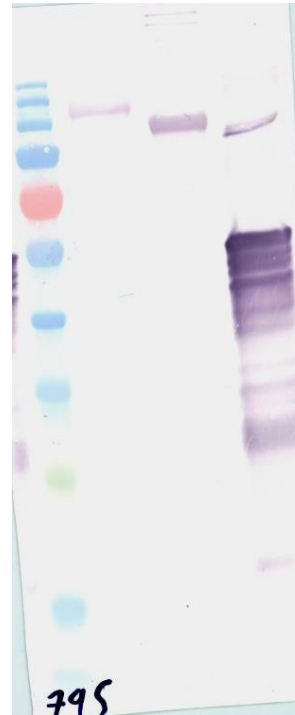

S1 S2 N

Sample 873

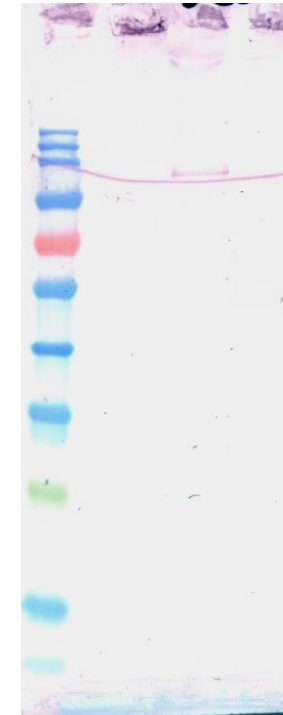

S1 S2 N

Sample 876

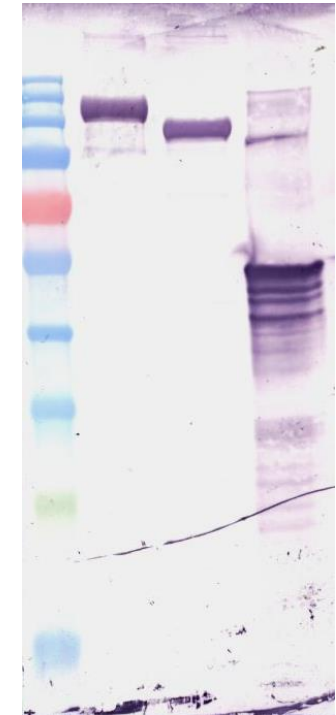

S1 S2 N





**Supplementary Data 3 – Western blot images**

S1 = spike subunit 1, S2 = spike subunit 2, N = nucleocapsid

Sample 878

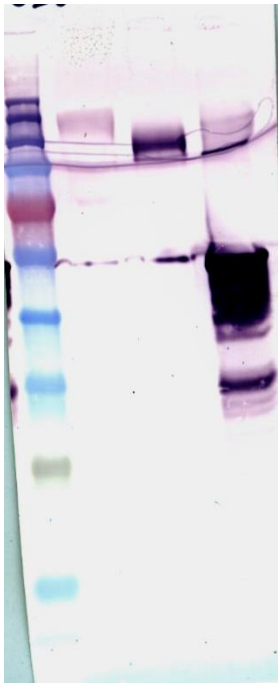

S1 S2 N

Sample 880

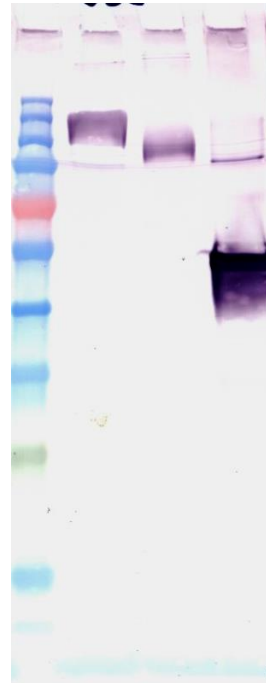

S1 S2 N

Sample 883

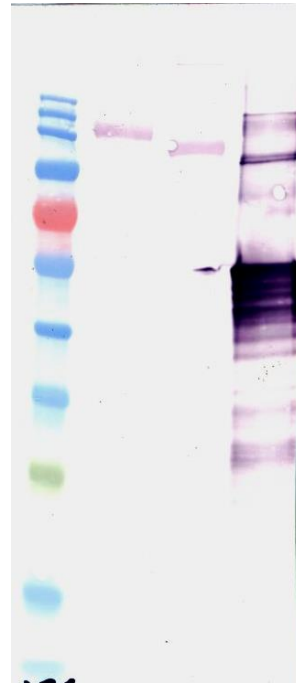

S1 S2 N

Sample 884

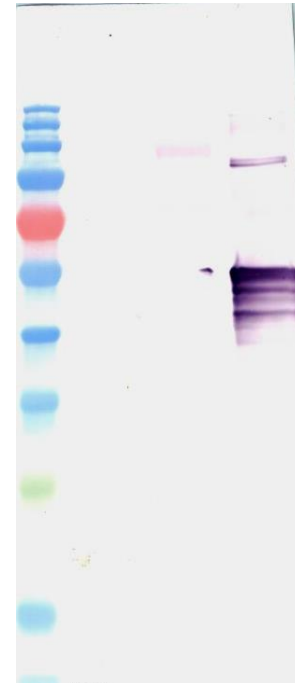

S1 S2 N

Sample 887

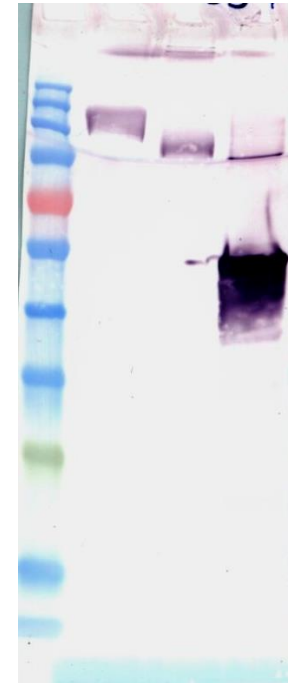

S1 S2 N

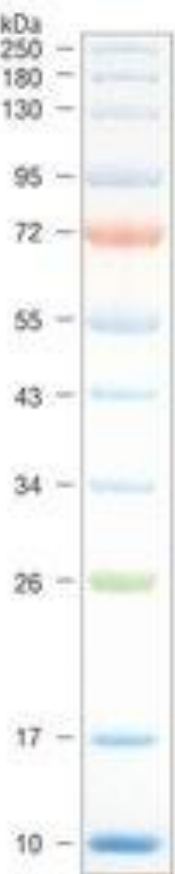

**Supplementary Data 3 – Western blot images**

S1 = spike subunit 1, S2 = spike subunit 2, N = nucleocapsid

Sample 888

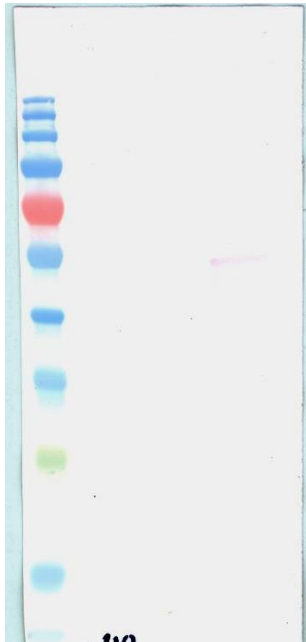

S1 S2 N

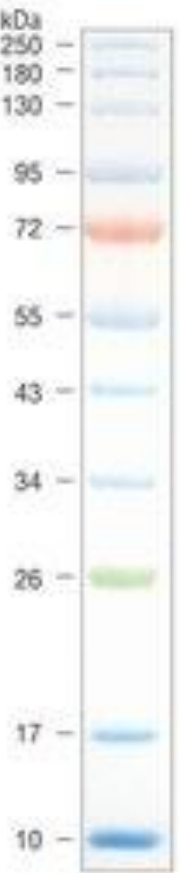

Supplement: MOESM2 [file 41598_2022_7263_MOESM2_ESM.pdf]
