# Supplementary material for: SARS-CoV-2 enzyme-linked immunosorbent assays as proxies for plaque reduction neutralisation tests
Source: Sci Rep. 2022 Mar 1;12:3351. doi: 10.1038/s41598-022-07263-8 (PMC8888744; doi:10.1038/s41598-022-07263-8)
Supplement: Supplementary file 1 — Supplementary Information 1. [file 41598_2022_7263_MOESM1_ESM.xlsx]

## Sheet: Data
			PRNT	MOL ELISA IgG NP/S2		MOL ELISA IgM NP/S2		Abcam ELISA IgG S1-RBD		Abcam ELISA IgM S1-RBD		WESTERN
SAMPLE ID	Day post swab	Day post symp	PRNT80	NOD	ELISA GROUP	OD	Interpretation	Norm IgG	Interpretation	Norm IgM	Interpretation	S1	S2	NP
11	15	19	<20	-0.28516	Negative	0.17	Negative	0.315789	Negative	0.0624093	Negative	Negative	Negative	Negative
63	15	15	20	-0.351501	Negative	0.286	Negative	5.55354	Positive	0.162554	Negative	Negative	Positive	Positive
241	14	34	320	0.986554	Medium Positive	0.407	Positive	11.4102	Positive	0.703919	Negative	Positive	Positive	Positive
275	10	13	1280	0.388626	Low Positive	0.226	Negative	8.15245	Positive	2.87518	Positive	Positive	Positive	Positive
297	27	31	160	1.0348	Medium Positive	2.329	Positive	11.5408	Positive	3.70682	Positive	Positive	Positive	Positive
303	14	20	640	1.05294	Medium Positive	0.366	Negative	9.68603	Positive	2.29173	Positive	Positive	Positive	Positive
314	26	27	80	1.09425	Medium Positive	1.428	Positive	11.0962	Positive	2.6836	Positive	Positive	Positive	Positive
351	34	35	<20	-0.168457	Negative	0.204463	Negative	3.1216	Positive	0.143687	Negative	NA	NA	NA
355	25	28	20	-0.262631	Negative	0.204463	Negative	0.359347	Negative	0.280116	Negative	Weak positive	Negative	Negative
383	12	15	320	0.476243	Low Positive	0.422834	Positive	3.72958	Positive	4.23512	Positive	Negative	Positive	Positive
415	19	21	1280	1.64187	High Positive	0.443296	Positive	10.7024	Positive	2.08853	Positive	Positive	Positive	Positive
453	11	24	<20	-0.286945	Negative	0.289833	Negative	6.3049	Positive	0.0580552	Negative	Negative	Negative	Negative
474	25	27	80	0.484918	Low Positive	0.518158	Positive	1.06534	Positive	1.2656	Positive	Negative	Positive	Positive
491	33	N/A	40	0.426199	Low Positive	0.303623	Negative	1.84029	Positive	0.312046	Negative	Negative	Positive	Positive
493	34	N/A	640	0.970997	Medium Positive	0.272015	Negative	6.35935	Positive	2.54572	Positive	Negative	Positive	Positive
497	28	33	<20	-0.221224	Negative	0.216055	Negative	1.34301	Positive	0.538462	Negative	Positive	Positive	Negative
515	29	39	1280	1.02394	Medium Positive	1.68228	Positive	12.1325	Positive	4.06386	Positive	Positive	Positive	Positive
545	21	23	40	1.08206	Medium Positive	0.362605	Negative	7.00363	Positive	0.251089	Negative	Negative	Positive	Positive
551	17	24	2560	1.51335	High Positive	1.24866	Positive	11.9292	Positive	2.85051	Positive	Positive	Positive	Positive
566	30	32	1280	1.07076	Medium Positive	0.410244	Positive	12.147	Positive	0.65312	Negative	Positive	Positive	Positive
605	30	38	1280	0.929588	Medium Positive	0.374814	Positive	3.53358	Positive	0.296081	Negative	Positive	Positive	Positive
661	16	21	80	0.256542	Low Positive	0.424417	Positive	10.4846	Positive	0.886792	Negative	Negative	Positive	Positive
724	13	20	<20	-0.223581	Negative	0.204048	Negative	0.136116	Negative	0.0885341	Negative	Negative	Negative	Negative
729	25	29	<20	0.470591	Low Positive	0.316832	Negative	4.05626	Positive	0.181422	Negative	Negative	Negative	Positive
730	26	N/A	2560	1.79091	High Positive	0.793235	Positive	10.5917	Positive	9.6328	Positive	Positive	Positive	Positive
742	36	41	640	0.481	Low Positive	0.217832	Negative	11.8421	Positive	1.44993	Positive	Positive	Positive	Positive
746	20	24	640	1.87843	High Positive	0.937753	Positive	5.48639	Positive	2.80842	Positive	Positive	Positive	Positive
751	43	46	40	1.5877	High Positive	0.211731	Negative	8.36116	Positive	0.976778	Negative	Positive	Positive	Positive
764	17	24	80	2.26843	High Positive	1.32226	Positive	11.4755	Positive	2.61829	Positive	Positive	Positive	Positive
767	52	60	40	0.0742589	Low Positive	0.280057	Negative	4.43739	Positive	0.444122	Negative	Negative	Negative	Very weak positive
789	43	52	40	0.935847	Medium Positive	0.413084	Positive	3.82214	Positive	0.0783745	Negative	Negative	Positive	Negative
794	37	44	80	1.72022	High Positive	0.234484	Negative	8.58439	Positive	0.918723	Negative	Negative	Positive	Positive
795	30	30	640	2.23618	High Positive	0.643208	Positive	7.59891	Positive	2.56459	Positive	Positive	Positive	Positive
873	39	N/A	40	-0.095136	Negative	0.226717	Negative	2.81125	Positive	0.658926	Negative	Negative	Very weak positive	Negative
876	34	38	1290	1.97039	High Positive	0.320294	Negative	11.2341	Positive	1.22787	Positive	Positive	Positive	Positive
878	30	48	160	2.33734	High Positive	0.693286	Positive	10.5009	Positive	1.40929	Positive	Positive	Positive	Positive
880	29	37	320	1.56578	High Positive	0.607752	Positive	12.0145	Positive	2.51089	Positive	Positive	Positive	Positive
883	41	48	2560	1.0191	Medium Positive	0.653362	Positive	8.36116	Positive	2.07112	Positive	Positive	Positive	Positive
884	53	N/A	40	0.256538	Low Positive	0.281531	Negative	5.40835	Positive	0.310595	Negative	Negative	Positive	Positive
887	14	17	320	1.85789	High Positive	0.574964	Positive	8.14519	Positive	2.60958	Positive	Positive	Positive	Positive
888	11	N/A	<20	-0.168413	Negative	0.367079	Positive	0.548094	Negative	0.435414	Negative	Negative	Negative	Very weak positive
Supplementary data 2 - Summary of results for each serum sample (Day post swab = days elapsed between initial SARS-CoV-2 positive swab, and serum sampling; Day post symp = days elapsed between onset of symptoms and serum sampling; PRNT80 = values shown are dilution factors of patient serum (1:x) that produced a ≥80% reduction in the number of plaques versus no serum controls; MOL ELISA IgG NP/S2:…
